# Supplementary material for: The Disproportionate Impact of COVID-19 among Undocumented Immigrants and Racial Minorities in the US
Source: MDPI journal article supplement (doi:10.3390/ijerph182312708), 2021-12-02
Supplement: s1 [file s1]

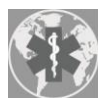

## Supplementary Material

**Table S1.** Description of socio-demographic and comorbidities features (Source: <https://www.arcgis.com/home/item.html?id=8e5c3c6e1fa94e379553e199dcc4e777&view=list#data> (accessed on 1 October 2021)).

| Feature                                | Description                                                                              |
|----------------------------------------|------------------------------------------------------------------------------------------|
| Population per sq. mile                | Population density (in 2013) (no. of people per square mile)                             |
| White                                  | Number of white people                                                                   |
| African American                       | Number of African American people                                                        |
| Native American                        | Number of Native American people                                                         |
| Asian                                  | Number of people of Asian race                                                           |
| Hawaiian and Pacific Islander          | Number of Hawaiian and Pacific Islanders                                                 |
| Hispanic                               | Number of Hispanic people                                                                |
| Other races                            | Aggregated number of people of other races                                               |
| Multi-racial                           | Number of people belonging to multiple races (those who identify with two or more races) |
| Male                                   | Number of males                                                                          |
| Female                                 | Number of females                                                                        |
| Age group < 5 years                    | Number of people below age 5                                                             |
| Age group 5 to 9 years                 | Number of people aged between 5 and 9                                                    |
| Age group 10 to 14 years               | Number of people aged between 10 and 14                                                  |
| Age group 15 to 19 years               | Number of people aged between 15 and 19                                                  |
| Age group 20 to 24 years               | Number of people aged between 20 and 24                                                  |
| Age group 25 to 34 years               | Number of people aged between 25 and 34                                                  |
| Age group 35 to 44 years               | Number of people aged between 35 and 44                                                  |
| Age group 45 to 54 years               | Number of people aged between 45 and 54                                                  |
| Age group 55 to 64 years               | Number of people aged between 55 and 64                                                  |
| Age group 65 to 74 years               | Number of people aged between 65 and 74                                                  |
| Age group 75 to 84 years               | Number of people aged between 75 and 84                                                  |
| Age group ≥ 85 years                   | Number of people aged 85 and above                                                       |
| Households                             | Number of households                                                                     |
| Average Household Size                 | The average number of people per household                                               |
| Households with One Male               | Number of 1-person male households                                                       |
| Households with One Female             | Number of 1-person female households                                                     |
| Married Households with Children       | Number of married-couple households with children                                        |
| Married Households with No Child       | Number of married-couple households with no child                                        |
| Male Headed Households with Children   | Number of male-headed households with children                                           |
| Female Headed Households with Children | Number of female-headed households with children                                         |
| Families                               | Number of families                                                                       |
| Average Family Size                    | The average number of people per family                                                  |
| Housing Units                          | Number of total housing units                                                            |
| Vacant Housing Units                   | Number of vacant housing units                                                           |
| Owner-occupied Housing Units           | Number of owner-occupied housing units                                                   |
| Renter-occupied Housing Units          | Number of renter-occupied housing units                                                  |
| Prevalence of Obesity                  | Number of people with obesity                                                            |
| Hypertension                           | Number of people suffering from hypertension                                             |
| Diabetes                               | Number of people affected with diabetes                                                  |
| CVD                                    | Number of people suffering from Cardiovascular disease                                   |
| HIV/AIDS                               | Number of people HIV/AIDS positive                                                       |

**Table S2.** Association of socio-demographic and comorbidities features with COVID-19 prevalence/mortality (Only features with a spearman coefficient of  $> 0.3$  with  $p$ -value  $< 0.05$  were selected).

| Time Segment            | COVID-19 prevalence                                                                                                                                                                                                                                                             |                                                                                                                                                                                                                                                | COVID-19 mortality                                                                                                                                                                                                                                |                                                                                                                                                                                     |
|-------------------------|---------------------------------------------------------------------------------------------------------------------------------------------------------------------------------------------------------------------------------------------------------------------------------|------------------------------------------------------------------------------------------------------------------------------------------------------------------------------------------------------------------------------------------------|---------------------------------------------------------------------------------------------------------------------------------------------------------------------------------------------------------------------------------------------------|-------------------------------------------------------------------------------------------------------------------------------------------------------------------------------------|
|                         | Positive spearman                                                                                                                                                                                                                                                               | Negative spearman                                                                                                                                                                                                                              | Positive spearman                                                                                                                                                                                                                                 | Negative spearman                                                                                                                                                                   |
| First wave              | <ul style="list-style-type: none"> <li>• African American</li> <li>• Female-Headed Households with Children</li> <li>• Age group 25 to 34 years</li> <li>• Age group <math>&lt; 5</math> years</li> <li>• Age group 20 to 24 years</li> <li>• Average Household Size</li> </ul> | <ul style="list-style-type: none"> <li>• White</li> <li>• Married Households with No Child</li> <li>• Age group 55 to 64 years</li> <li>• Owner-occupied Housing Units</li> <li>• Age group 45 to 54 years</li> <li>• Housing Units</li> </ul> | <ul style="list-style-type: none"> <li>• African American</li> <li>• Female-Headed Households with Children</li> </ul>                                                                                                                            | <ul style="list-style-type: none"> <li>• White</li> </ul>                                                                                                                           |
| Second wave             | <ul style="list-style-type: none"> <li>• White</li> <li>• Age group <math>\geq 85</math> years</li> </ul>                                                                                                                                                                       | <ul style="list-style-type: none"> <li>• African American</li> </ul>                                                                                                                                                                           | <ul style="list-style-type: none"> <li>• Age group 75 to 84 years</li> <li>• Age group <math>\geq 85</math> years</li> <li>• Male</li> <li>• Owner-occupied Housing Units</li> <li>• White</li> <li>• Married Households with No Child</li> </ul> | <ul style="list-style-type: none"> <li>• Population per sq. mile</li> <li>• Asian</li> <li>• Population</li> <li>• Average Family Size</li> <li>• Average Household Size</li> </ul> |
| Vaccination             | <ul style="list-style-type: none"> <li>• Female-Headed Households with Children</li> <li>• African American</li> </ul>                                                                                                                                                          |                                                                                                                                                                                                                                                | <ul style="list-style-type: none"> <li>• CVD</li> <li>• Diabetes</li> <li>• Female-Headed Households with Children</li> </ul>                                                                                                                     |                                                                                                                                                                                     |
| The entire study period | <ul style="list-style-type: none"> <li>• Age group <math>&lt; 5</math> years</li> </ul>                                                                                                                                                                                         |                                                                                                                                                                                                                                                | <ul style="list-style-type: none"> <li>• CVD</li> <li>• Female-Headed Households with Children</li> <li>• Female</li> <li>• Diabetes</li> </ul>                                                                                                   | <ul style="list-style-type: none"> <li>• Asian</li> </ul>                                                                                                                           |

**Table S3.** Impact of socio-demographic & comorbidities features on Prevalence/Mortality (only features having high importance were chosen).

| Time Segment | COVID-19 prevalence                                                                                                                                                                                                                                                                                                                                      |                                                                                                                                                                                                                                                                | COVID-19 mortality                                                                                                                                                                                                                                                                                                                                                                                               |                                                                                                                                                                                                                                                                                                 |
|--------------|----------------------------------------------------------------------------------------------------------------------------------------------------------------------------------------------------------------------------------------------------------------------------------------------------------------------------------------------------------|----------------------------------------------------------------------------------------------------------------------------------------------------------------------------------------------------------------------------------------------------------------|------------------------------------------------------------------------------------------------------------------------------------------------------------------------------------------------------------------------------------------------------------------------------------------------------------------------------------------------------------------------------------------------------------------|-------------------------------------------------------------------------------------------------------------------------------------------------------------------------------------------------------------------------------------------------------------------------------------------------|
|              | Positive impact                                                                                                                                                                                                                                                                                                                                          | Negative impact                                                                                                                                                                                                                                                | Positive impact                                                                                                                                                                                                                                                                                                                                                                                                  | Negative impact                                                                                                                                                                                                                                                                                 |
| First wave   | <ul style="list-style-type: none"> <li>African American</li> <li>Other races</li> <li>CVD</li> <li>Age group &lt; 5 years</li> <li>Age group ≥ 85 years</li> <li>Hispanic</li> <li>HIV/AIDS</li> <li>Age group 5 to 9 years</li> <li>Age group 25 to 34 years</li> <li>Male</li> <li>Diabetes</li> <li>Female-Headed Households with Children</li> </ul> | <ul style="list-style-type: none"> <li>Age group 55 to 64 years</li> <li>White</li> <li>Multi-racial</li> <li>Age group 45 to 54 years</li> </ul>                                                                                                              | <ul style="list-style-type: none"> <li>African American</li> <li>Female-Headed Households with Children</li> <li>Hispanic</li> <li>Native American</li> <li>Age group ≥ 85 years</li> <li>Population per sq. mile</li> <li>HIV/AIDS</li> <li>Other races</li> <li>Female</li> <li>Age group 10 to 14 years</li> <li>Renter-occupied Housing Units</li> <li>Age group &lt; 5 years</li> <li>Population</li> </ul> | <ul style="list-style-type: none"> <li>Multi-racial Households with One Male</li> <li>Married Households with No Child</li> </ul>                                                                                                                                                               |
| Second wave  | <ul style="list-style-type: none"> <li>Age group ≥ 85 years</li> <li>White</li> <li>Age group &lt; 5 years</li> <li>Age group 25 to 34 years</li> <li>Native American</li> <li>Female-Headed Households with Children</li> <li>Male</li> <li>CVD</li> </ul>                                                                                              | <ul style="list-style-type: none"> <li>African American</li> <li>Vacant Housing Units</li> <li>Multi-racial</li> <li>Age group 55 to 64 years</li> <li>Female</li> <li>Asian</li> <li>Age group 65 to 74 years</li> </ul>                                      | <ul style="list-style-type: none"> <li>Age group ≥ 85 years</li> <li>Age group 75 to 84 years</li> <li>Age group &lt; 5 years</li> <li>Hispanic</li> <li>Native American</li> <li>White</li> <li>Male</li> <li>CVD</li> </ul>                                                                                                                                                                                    | <ul style="list-style-type: none"> <li>Asian</li> <li>Age group 55 to 64 years</li> <li>Other races</li> <li>Female</li> <li>Vacant Housing Units</li> <li>Age group 45 to 54 years</li> <li>Population per sq. mile</li> <li>Multi-racial</li> </ul>                                           |
| Vaccination  | <ul style="list-style-type: none"> <li>Female-Headed Households with Children</li> <li>CVD</li> <li>Population</li> <li>HIV/AIDS</li> <li>Diabetes</li> <li>African American</li> <li>Multi-racial</li> <li>Hispanic</li> <li>Age group 65 to 74 years</li> </ul>                                                                                        | <ul style="list-style-type: none"> <li>Age group 45 to 54 years</li> <li>Age group ≥ 85 years</li> <li>Renter-occupied Housing Units</li> <li>Age group 5 to 9 years</li> <li>Households with One Male</li> <li>Average Family Size</li> <li>Female</li> </ul> | <ul style="list-style-type: none"> <li>CVD</li> <li>African American</li> <li>Diabetes</li> <li>Female-Headed Households with Children</li> <li>Age group 65 to 74 years</li> <li>Hispanic</li> <li>Other races</li> <li>Age group 75 to 84 years</li> </ul>                                                                                                                                                     | <ul style="list-style-type: none"> <li>Age group 45 to 54 years</li> <li>Asian</li> <li>Population</li> <li>Average Family Size</li> <li>Male Headed Households with Children</li> <li>Hawaiian and Pacific Islander</li> <li>Vacant Housing Units</li> <li>Age group 25 to 34 years</li> </ul> |

---

|                         |                                                                                                                                                                                                                                                                                                          |                                                                                                                                                                                                                                         |                                                                                                                                                                                                                                                                                       |                                                                                                                                                                                                                                                                              |
|-------------------------|----------------------------------------------------------------------------------------------------------------------------------------------------------------------------------------------------------------------------------------------------------------------------------------------------------|-----------------------------------------------------------------------------------------------------------------------------------------------------------------------------------------------------------------------------------------|---------------------------------------------------------------------------------------------------------------------------------------------------------------------------------------------------------------------------------------------------------------------------------------|------------------------------------------------------------------------------------------------------------------------------------------------------------------------------------------------------------------------------------------------------------------------------|
| The entire study period | <ul style="list-style-type: none"> <li>• CVD</li> <li>• Age group 25 to 34 years</li> <li>• Female-Headed Households with Children</li> <li>• Age group &lt; 5 years</li> <li>• Age group ≥ 85 years</li> <li>• Hispanic</li> <li>• Diabetes</li> <li>• Population</li> <li>• Native American</li> </ul> | <ul style="list-style-type: none"> <li>• Multi-racial</li> <li>• Age group 55 to 64 years</li> <li>• Age group 45 to 54 years</li> <li>• Vacant Housing Units</li> <li>• Asian</li> <li>• African American</li> <li>• Female</li> </ul> | <ul style="list-style-type: none"> <li>• Female-Headed Households with Children</li> <li>• CVD</li> <li>• Age group 75 to 84 years</li> <li>• Hispanic</li> <li>• Age group ≥ 85 years</li> <li>• African American</li> <li>• Diabetes</li> <li>• Age group 65 to 74 years</li> </ul> | <ul style="list-style-type: none"> <li>• Asian</li> <li>• Multi-racial</li> <li>• Age group 45 to 54 years</li> <li>• Housing units</li> <li>• Renter-occupied Housing Units</li> <li>• Hawaiian and Pacific Islander</li> <li>• Married Households with No Child</li> </ul> |
|                         |                                                                                                                                                                                                                                                                                                          |                                                                                                                                                                                                                                         |                                                                                                                                                                                                                                                                                       |                                                                                                                                                                                                                                                                              |

---

Percentage of Unauthorized Population(County Wise)

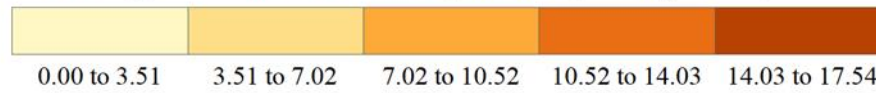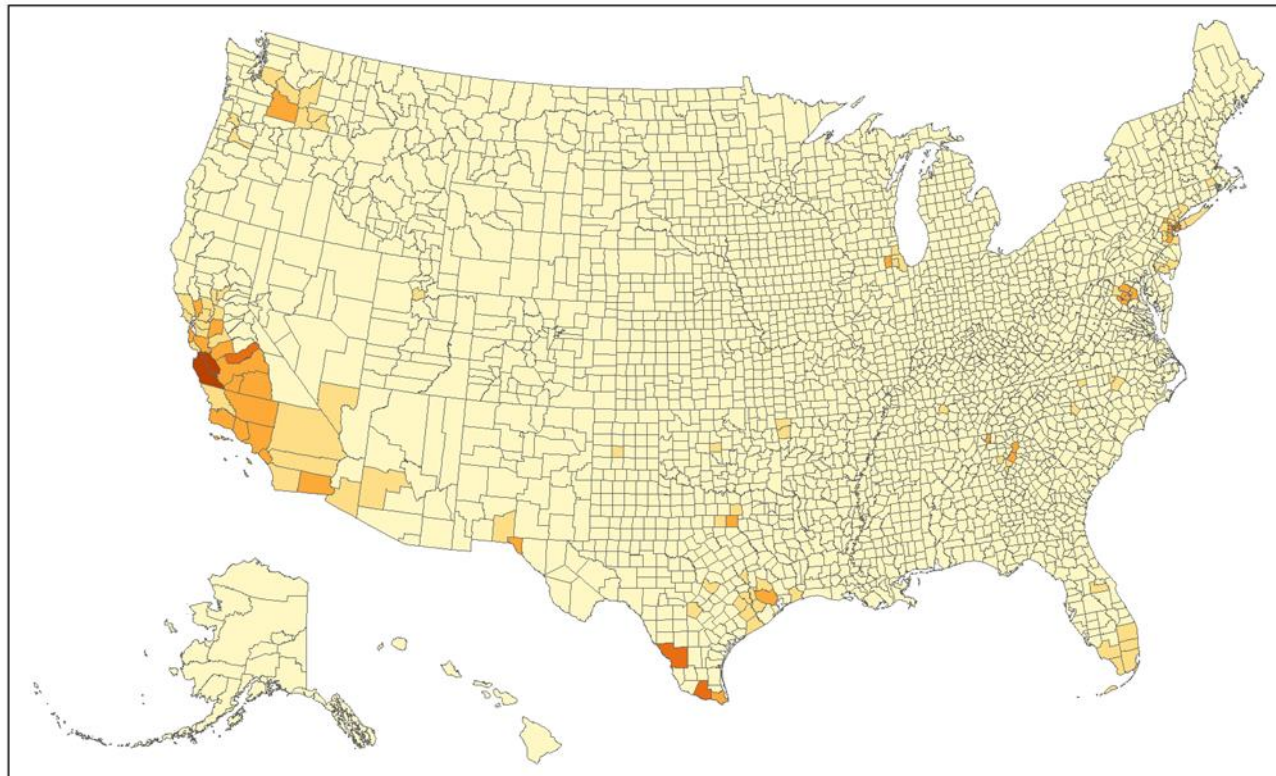

**Figure S1.** Spatial distribution of unauthorized population in the US.

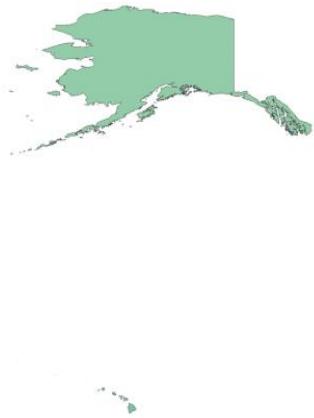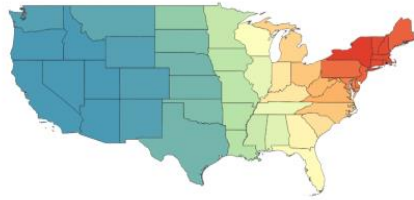

06-04-2020

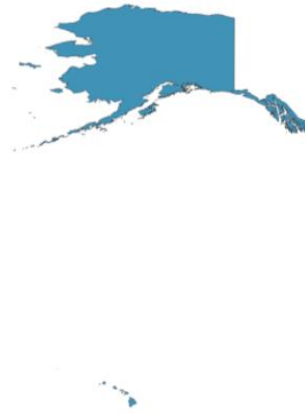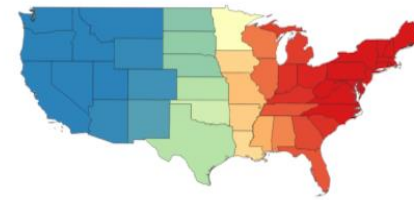

14-05-2020

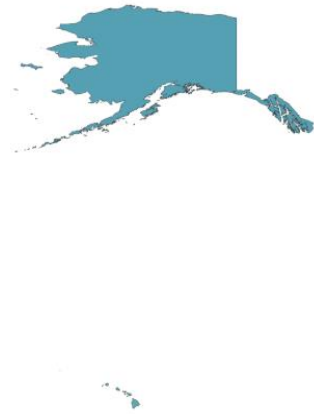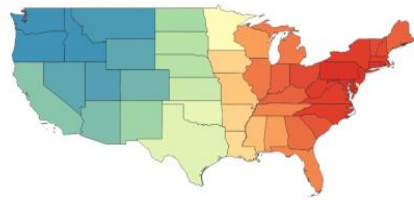

06-06-2020

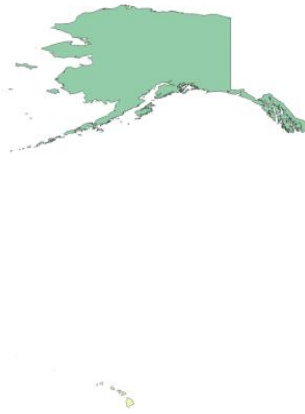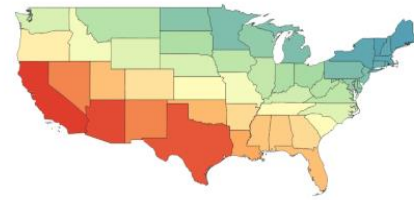

23-06-2020

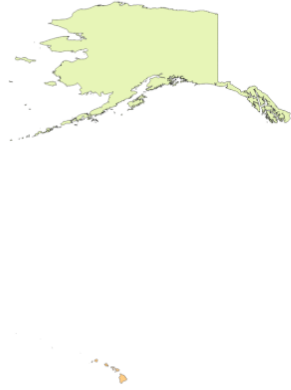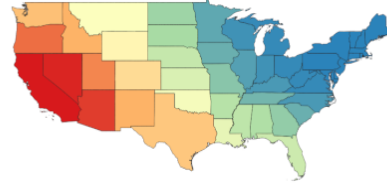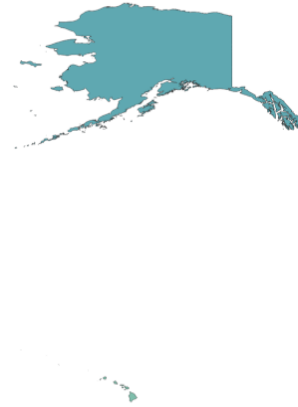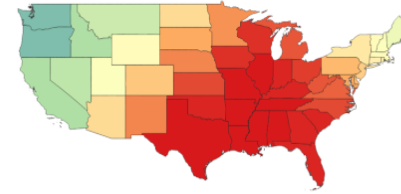

19-07-2020

09-10-2020

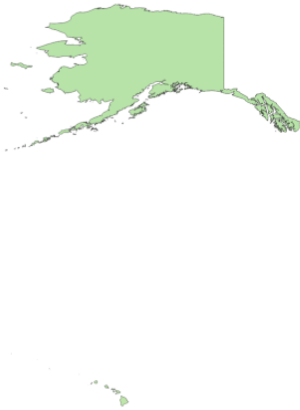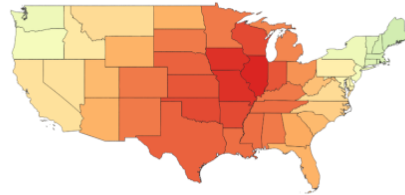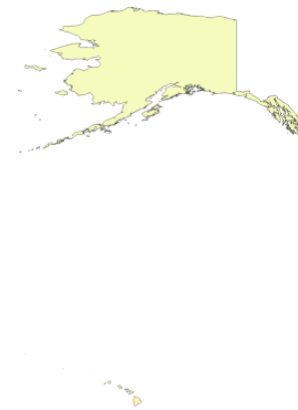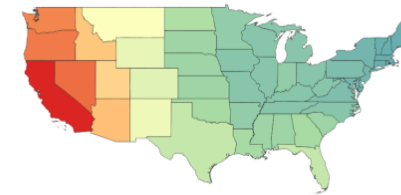

14-11-2020

01-01-2021

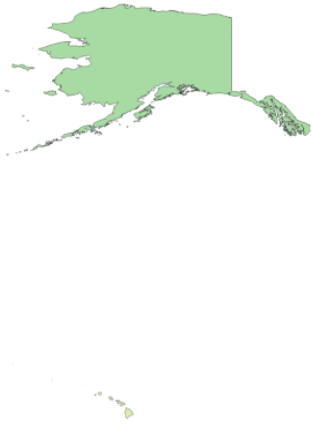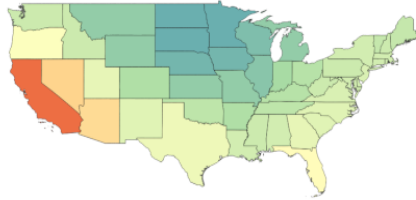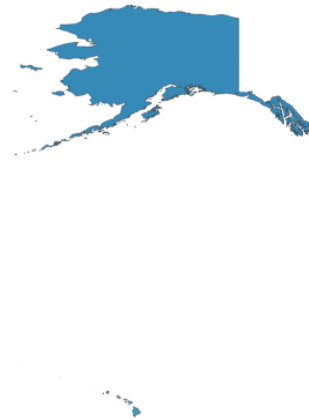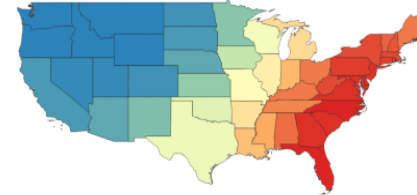

07-02-2021

02-03-2021

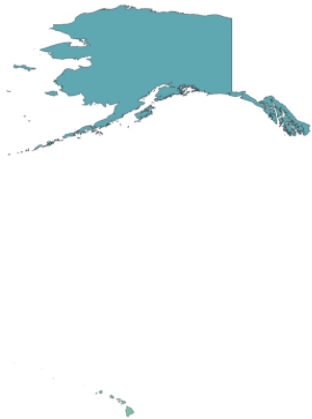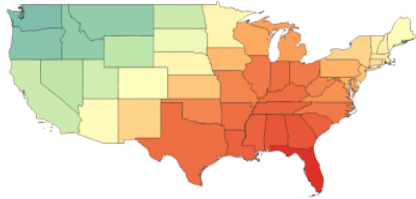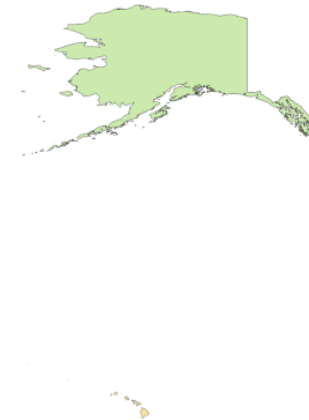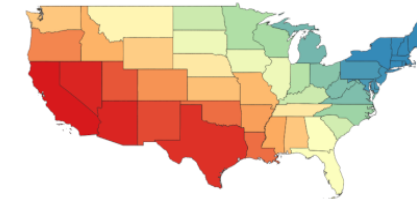

01-06-2021

28-07-2021



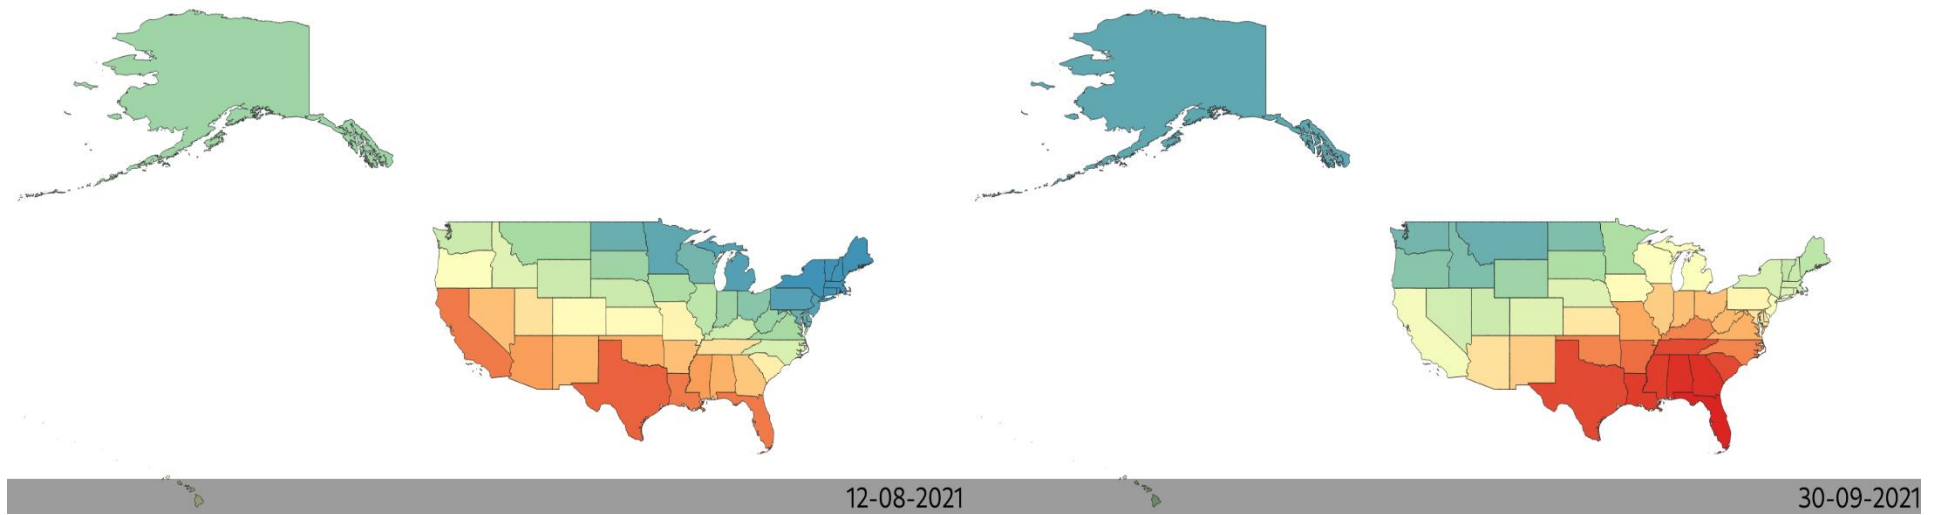

**Figure S2.** Geographic hotspots of COVID-19 in the USA.

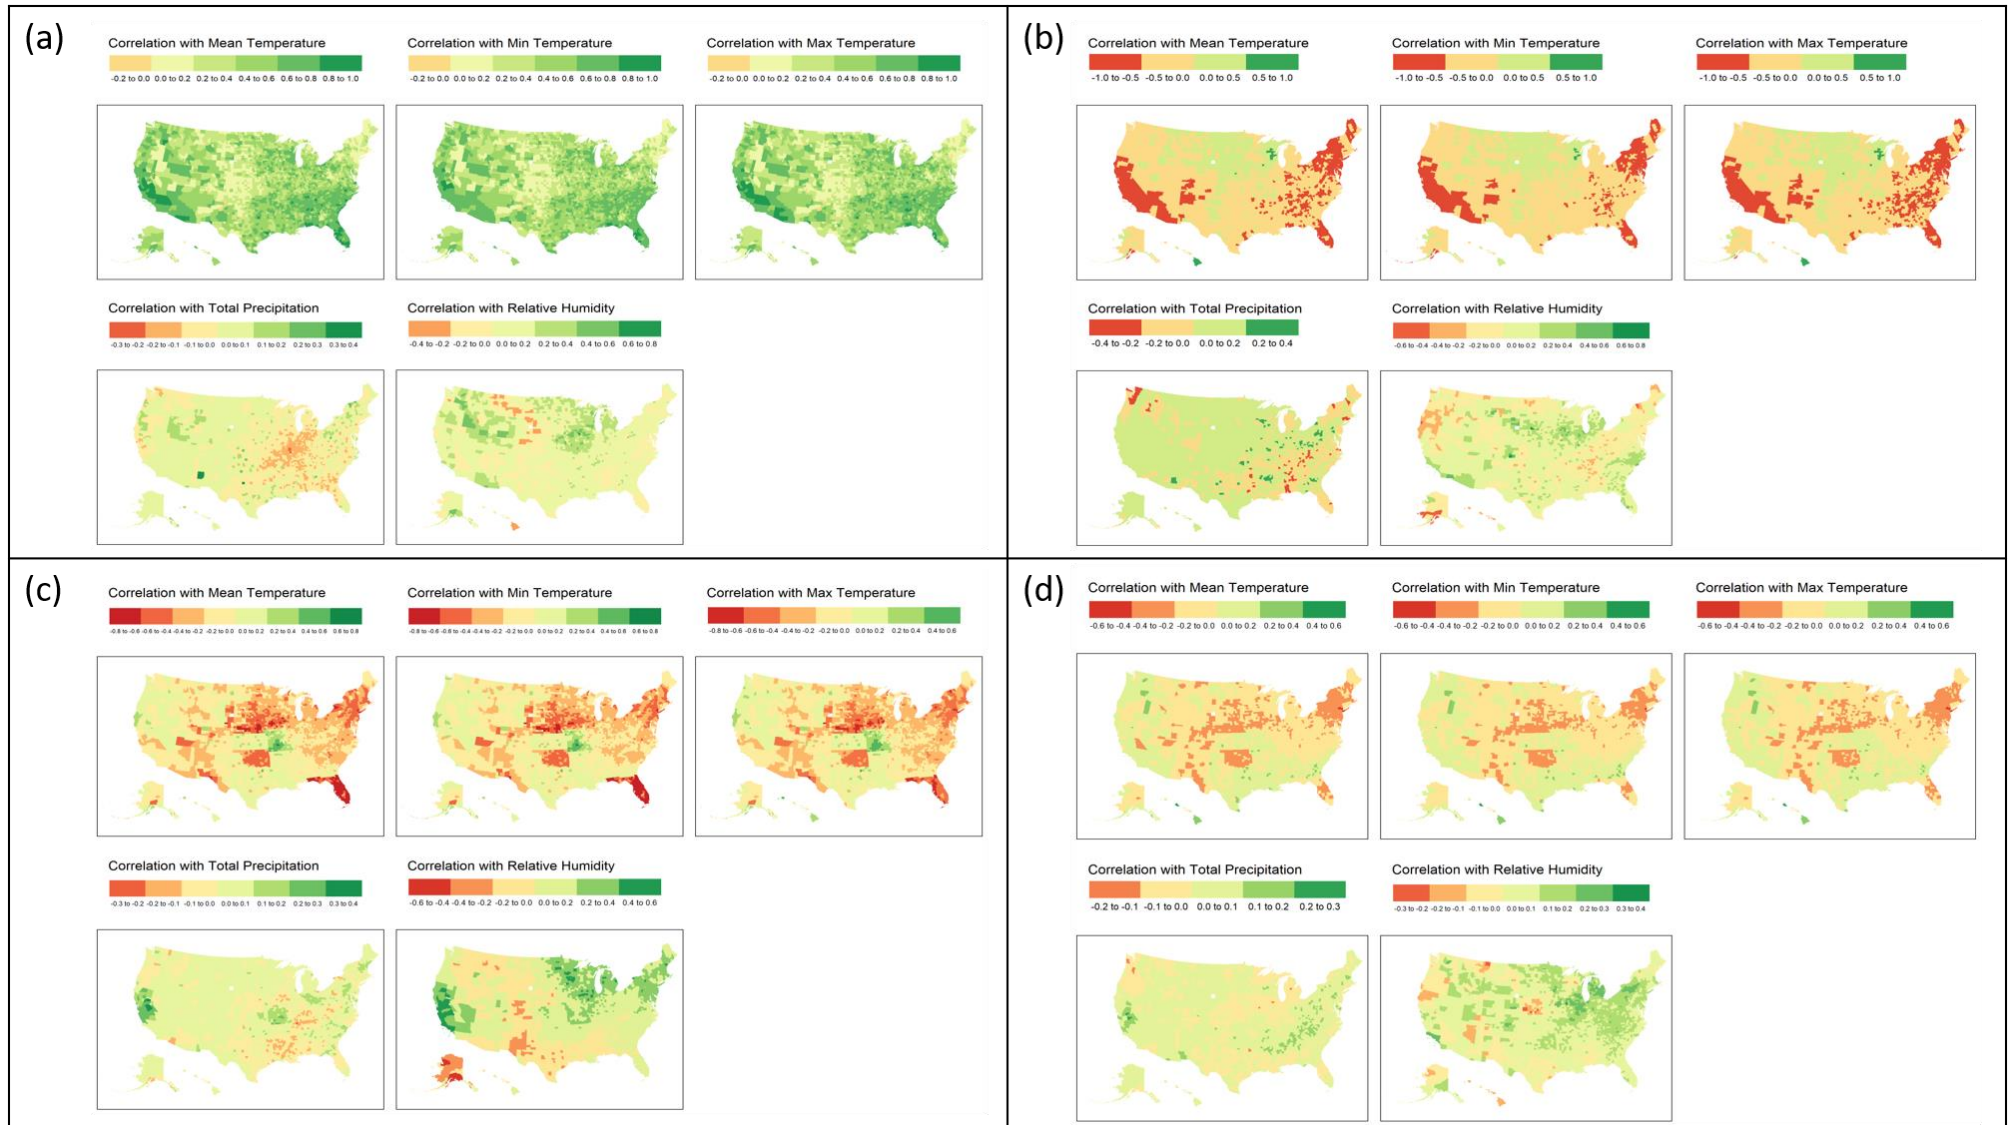

**Figure S3.** Spearman correlation values were calculated for each meteorological feature with the daily prevalence (at a county-level). We conducted this for each time segment and plotted the values of each county on the map. In the figure, indices (a)–(d) indicate plots for different time segments: (a) first wave, (b) second wave, (c) vaccination period, and (d) the entire study period).

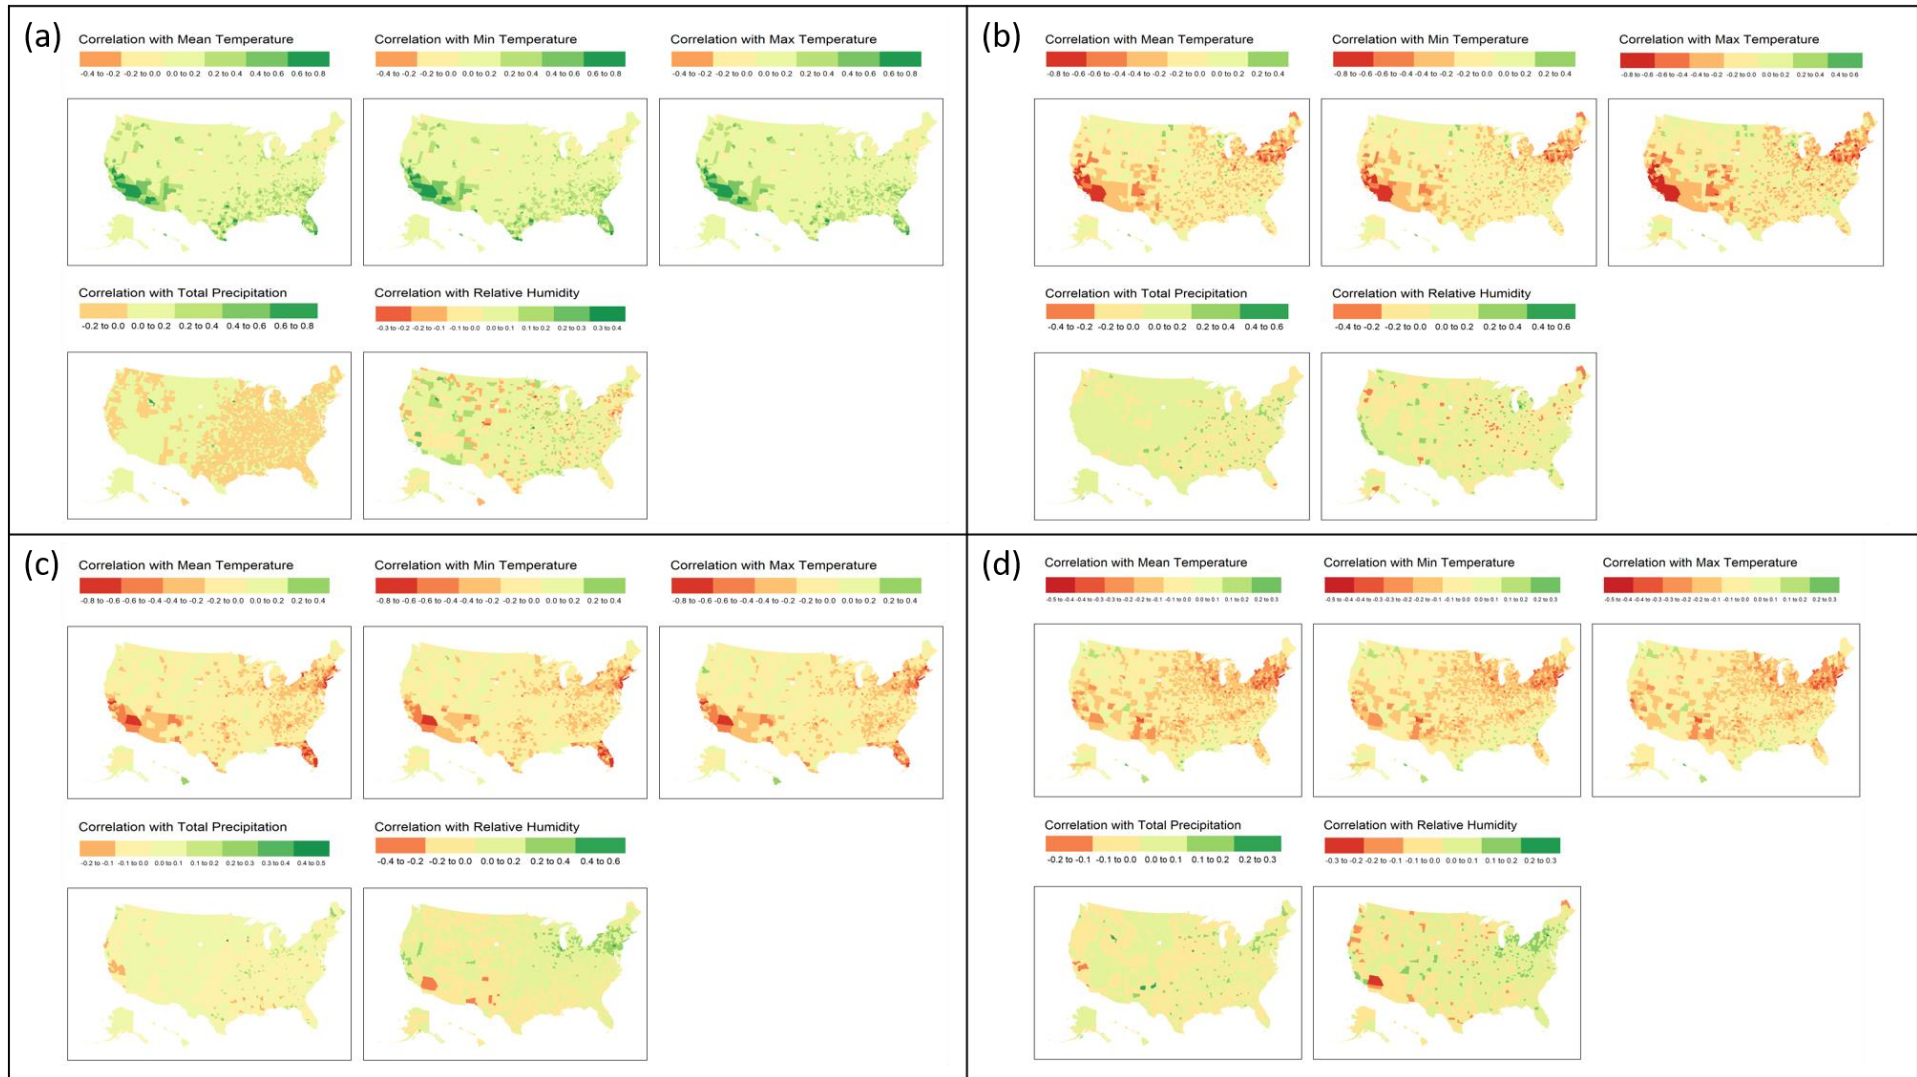

**Figure S4.** Spearman correlation values were calculated for each meteorological feature with the daily mortality (in a county-wise manner). We conducted this for each time segment and plotted the values of each county on the map. In the figure, indices (a)–(d) indicate plots for different time segments: (a) first wave, (b) second wave, (c) vaccination period, and (d) the entire study period).
